# Supplementary material for: Assessing the Efficacy of Active Learning to Support Student Performance Across Undergraduate Programmes in Biomedical Science
Source: PubMed Central journal article supplement (PMC10945544; doi:10.3389/bjbs.2024.12148), 2024-03-04
Supplement: Table1.pdf [file Table1.pdf]

| <b>Course</b>                  | <b>Standard Entry Conditions</b> |
|--------------------------------|----------------------------------|
| Biomedical Science (Pathology) | BBB                              |
| Biomedical Science DPP         | BBB                              |
| Biomedical Science             | BBB                              |
| Dietetics                      | BCC                              |
| Food & Nutrition               | CCC                              |
| Human Nutrition                | BCC                              |
| Optometry                      | ABB                              |

Supplementary Table 1. Standard entry requirements for each cohort of students taking the Medical Cell Biology module
